# Supplementary material for: Assembling a high-performance asymmetric supercapacitor based on pseudocapacitive S-doped VSe2/CNT hybrid and 2D borocarbonitride nanosheets
Source: Royal Society of Chemistry journal article supplement (doi:10.1039/d2tc04600h), 2023-01-01
Supplement: d2tc04600h1.pdf [file d2tc04600h1.pdf]

## **Supporting Information**

# **Assembling a High-Performance Asymmetric Supercapacitor Based on Pseudocapacitive S doped VSe<sub>2</sub>/CNT Hybrid and 2D Borocarbonitride Nanosheets**

Sree Raj K A, <sup>1</sup> K. Pramoda <sup>1</sup>, and Chandra Sekhar Rout\*,<sup>1</sup>

<sup>1</sup> *Centre for Nano and Material Sciences, Jain (deemed-to-be University), Jain global campus, Jakkasandra, Ramanagaram, Bangalore - 562112, India.*

*\*Corresponding author: csrout@gmail.com, r.chandrasekhar@jainuniversity.ac.in (CSR).*

## **S1. Experimental**

### **S1.1 Materials**

Ammonium metavanadate (NH<sub>4</sub>VO<sub>3</sub>, SDFCL AR), Selenium dioxide (SeO<sub>2</sub>, Himedia), Formic acid (SDFCL AR), Sulphur powder (Himedia), Multi walled carbon nanotube (<5% impurity, 1-10µm length and 3-15 number of walls, Plasma Chem GmbH, Berlin), Boric acid (SDFCL AR), Activated charcoal (Avra), Urea (SDFCL AR) and DI water.

### **S1.2 Synthesis of S-VSe<sub>2</sub>/CNT**

117 mg of NH<sub>4</sub>VO<sub>3</sub> and 220 mg of SeO<sub>2</sub> is dispersed in 15 mL DI water. Then 5 mL of formic acid is added drop wise into this dispersion. 16 wt % of S powder is dispersed in 10 mL DI water through vigorous 1 hr ultra-sonication. This solution is thoroughly mixed along with the initial dispersion and the solution volume is raised to 40 mL by adding DI water. Further, 50 mg of functionalized (using H<sub>2</sub>SO<sub>4</sub> and HNO<sub>3</sub>) multiwalled carbon nanotube is added to the mixture under ultra-sonication. The mixture is then transferred into a 50 mL Teflon lined stainless steel autoclave and is kept under 200° C for 24 hrs. After the reaction, the product is

collected and washed several times using DI water and ethanol then dried in vacuum at 60° C.

### **S1.3 Synthesis of BCN**

To synthesize BCN, boric acid (60 mg), activated charcoal (500 mg) and urea (2.4 g) are added into DI water under vigorous stirring and kept at 80° C till a slurry is obtained. The obtained slurry is then transferred into a quartz boat, transferred to a tubular furnace and heated at 900° C under N<sub>2</sub> atmosphere. The obtained black powder is kept in air-tight container to utilize for further analysis.

### **S1.4 Material Characterization**

Structural and morphological characterizations of the samples are carried using X-Ray diffraction (XRD, Rigaku Ultima IV X-ray diffractometer with Ni-filter (Cu K $\alpha$ ,  $\lambda$  = 0.1541 nm) and field emission scanning microscope (FESEM, JEOL JSM-7100F, JEOL Ltd., Singapore). Raman spectroscopy is carried out in LABRAM HR (Horiba Jobin Yvon, 488  $\lambda$  = nm). X-ray photo electron spectroscopy (XPS) measurements are performed in Thermo K-alpha spectrometer using micro focused and monochromated Al K $\alpha$  radiation with an energy of 1486.6 eV.

### **S1.5 Electrochemical Characterization**

Electrochemical assessments of all the samples are carried in a Wuhan Corrtest electrochemical work station. The three-electrode analysis are performed in a conventional three electrode cell with Ag/AgCl as reference electrode, Pt wire as counter electrode, a typical glassy carbon electrode with an area of 0.071 cm<sup>2</sup> as working electrode and 0.5M K<sub>2</sub>SO<sub>4</sub> as electrolyte. The working electrode is prepared by drop casting 5  $\mu$ L of active material solution; this is prepared by dissolving 1 mg of active material in a solution containing 95  $\mu$ L of propanol and 5  $\mu$ L

Nafion binder. The asymmetric supercapacitor is assembled in a typical Swagelok set up with the working electrodes prepared by drop casting active material solution on a circular Ni foam conducting substrate and Whatman filter paper as a separator. Electrochemical impedance spectroscopy (EIS) measurements are obtained in the frequency range of 0.01 Hz – 10 kHz. The mass loading in both positrode and negatrode are 1 mg and 1.56 mg respectively.

## S2. Calculations

In three-electrode configuration;

*Areal capacitance ( $C_A$ ) from cyclic voltammetry;*

$$C_A = \frac{\int I(V) dV}{2 * A * \nu * \Delta V} \quad (S1)$$

Where, A is the active area of the electrode,  $\nu$  is the scan rate and  $\Delta V$  is the potential window.

*Areal capacitance ( $C_A$ ) from galvanostatic charge discharge;*

$$C_A = \frac{i * \Delta t}{A * \Delta V} \quad (S2)$$

Where, i is the applied current,  $\Delta t$  is the discharge time.

*Areal capacitance ( $C_A$ ) from galvanostatic charge discharge for non-linear curves;*

$$C_A = \frac{2 * i * \int V dt}{A * (V_f^2 - V_i^2)} \quad (S3)$$

*Areal capacitance ( $C_A$ ) of ASC from galvanostatic charge discharge;*

$$C_A = \frac{i * \Delta t}{A * \Delta V} \quad (S4)$$

*Charge balance equation*

$$\frac{m_+}{m_-} = \frac{C_- * \Delta V_-}{C_+ * \Delta V_+} \quad (S5)$$

*Energy density of ASC;*

$$E_D = \frac{1}{2}CV^2 \quad (S6)$$

Where, C is areal capacitance of ASC, V is the working window of ASC.

*Power density of ASC;*

$$P_D = \frac{E_D}{\Delta t} \quad (S7)$$

### S3. Supporting Figures

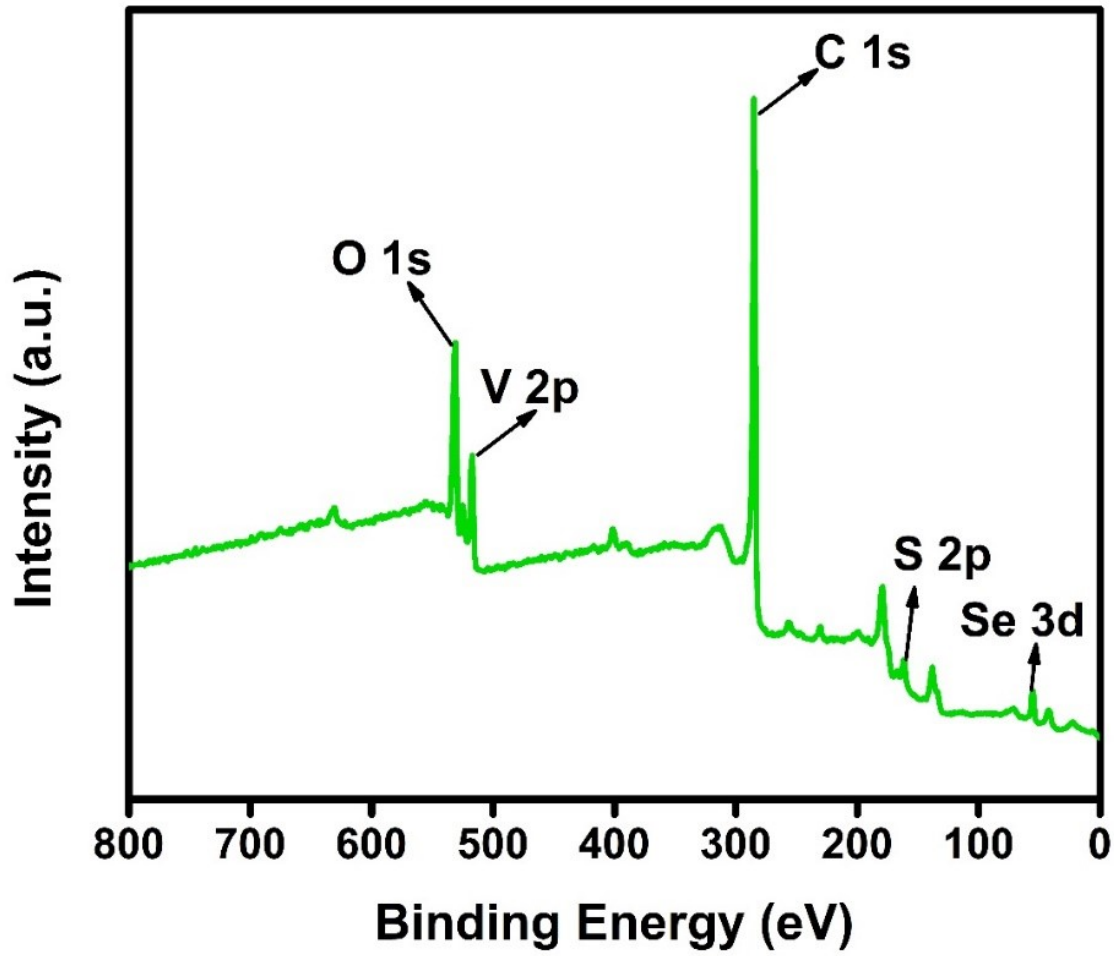

**Figure S1:** XPS survey spectrum of S-VSe<sub>2</sub>/CNT.

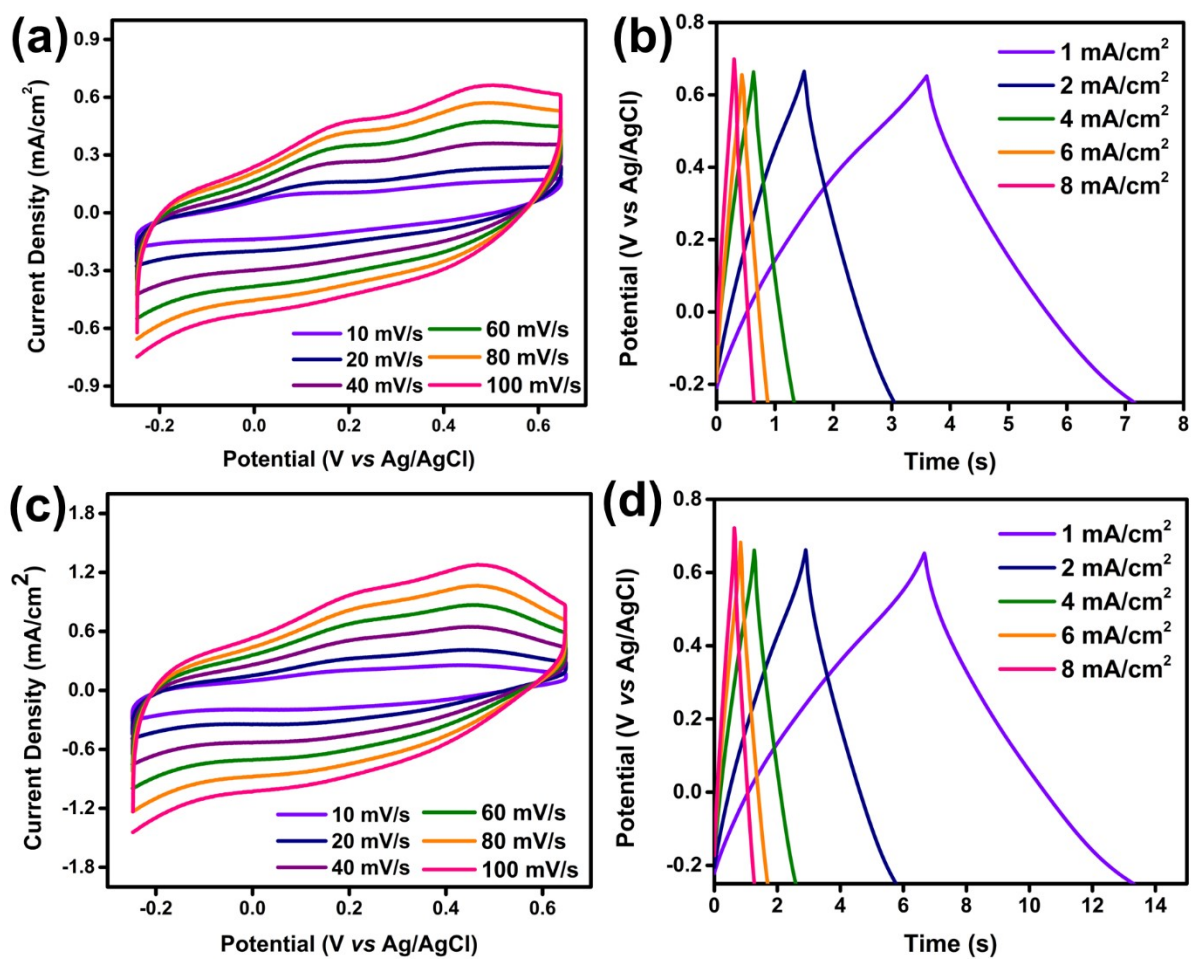

**Figure S2:** (a) CV and (b) GCD profiles of pristine VSe<sub>2</sub> in various scan rates and current densities respectively, (c) CV and (d) GCD profiles of pristine S-VSe<sub>2</sub> in various scan rates and current densities respectively.

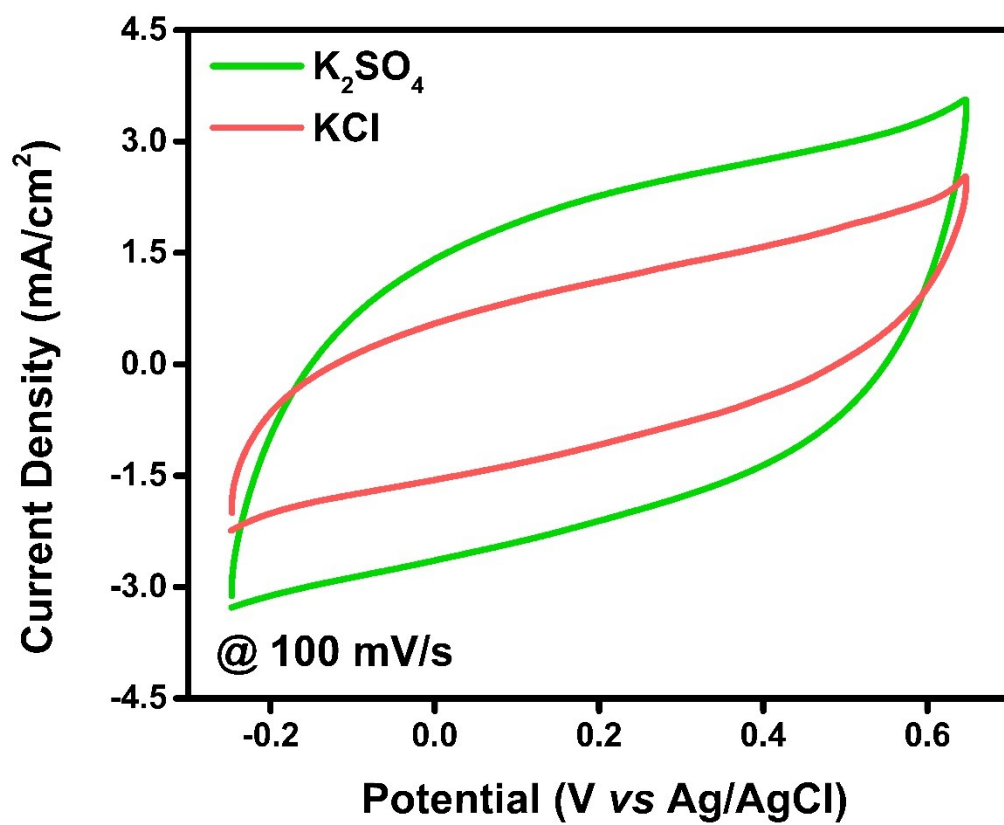

**Figure S3:** CV curves of S-VSe<sub>2</sub>/CNT electrode in both K<sub>2</sub>SO<sub>4</sub> and KCl electrolytes.

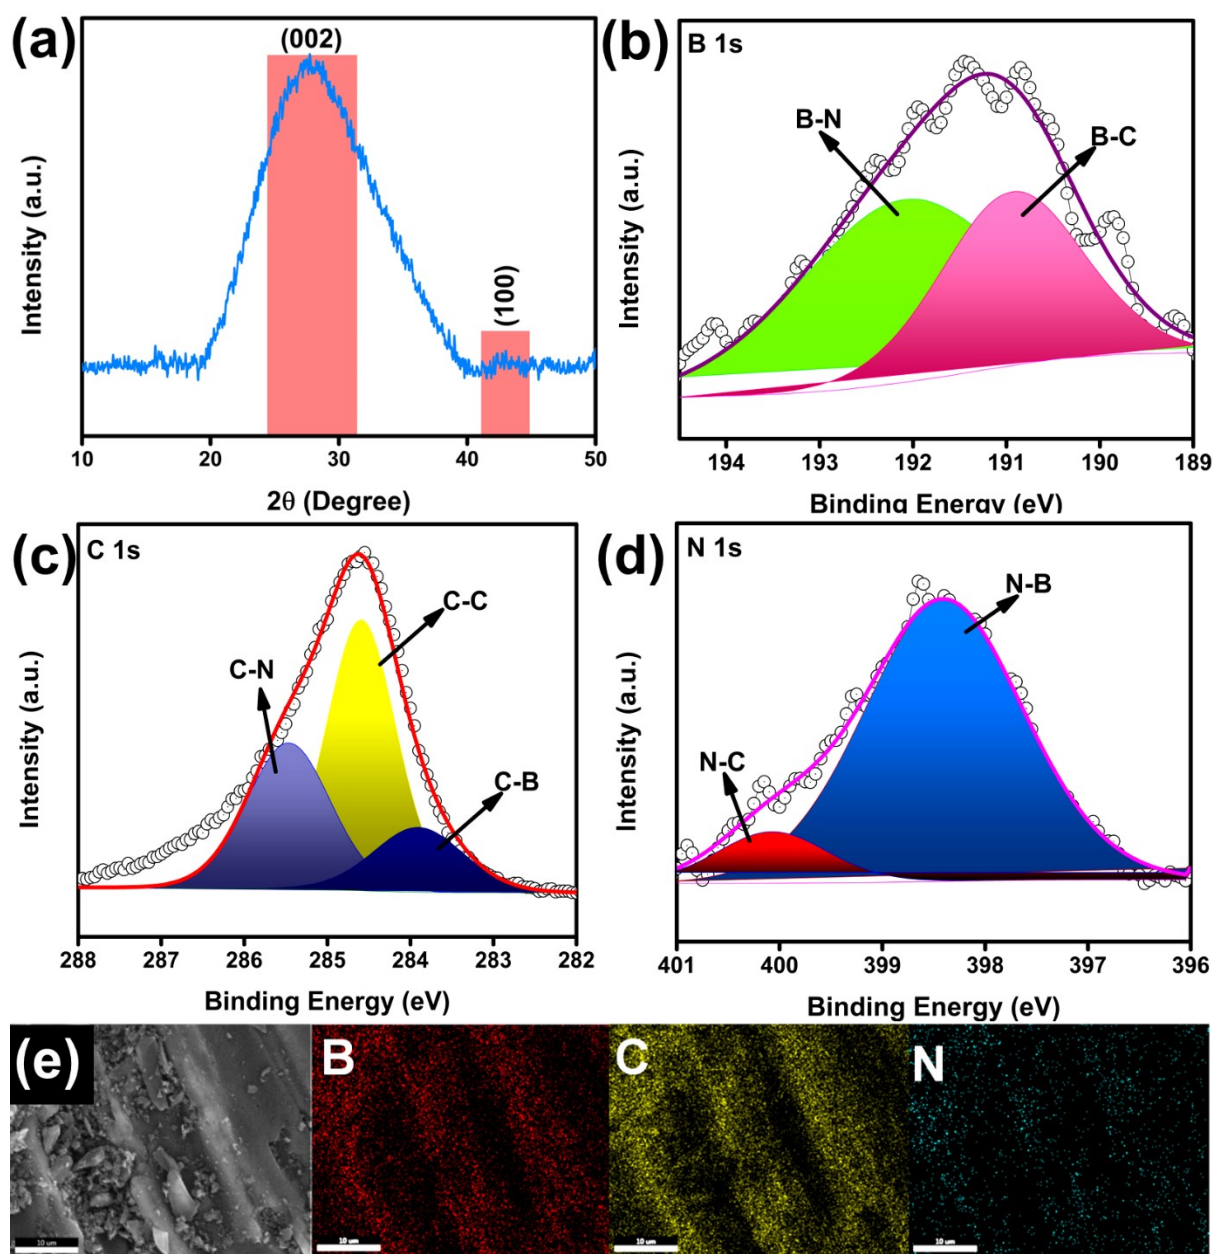

**Figure S4:** (a) XRD of BCN, High-resolution XPS spectra of (b) B 1s, (c) C 1s and (d) N 1s of BCN and (e) EDS elemental mapping of BCN sheets showing the uniform distribution of B, C and N.

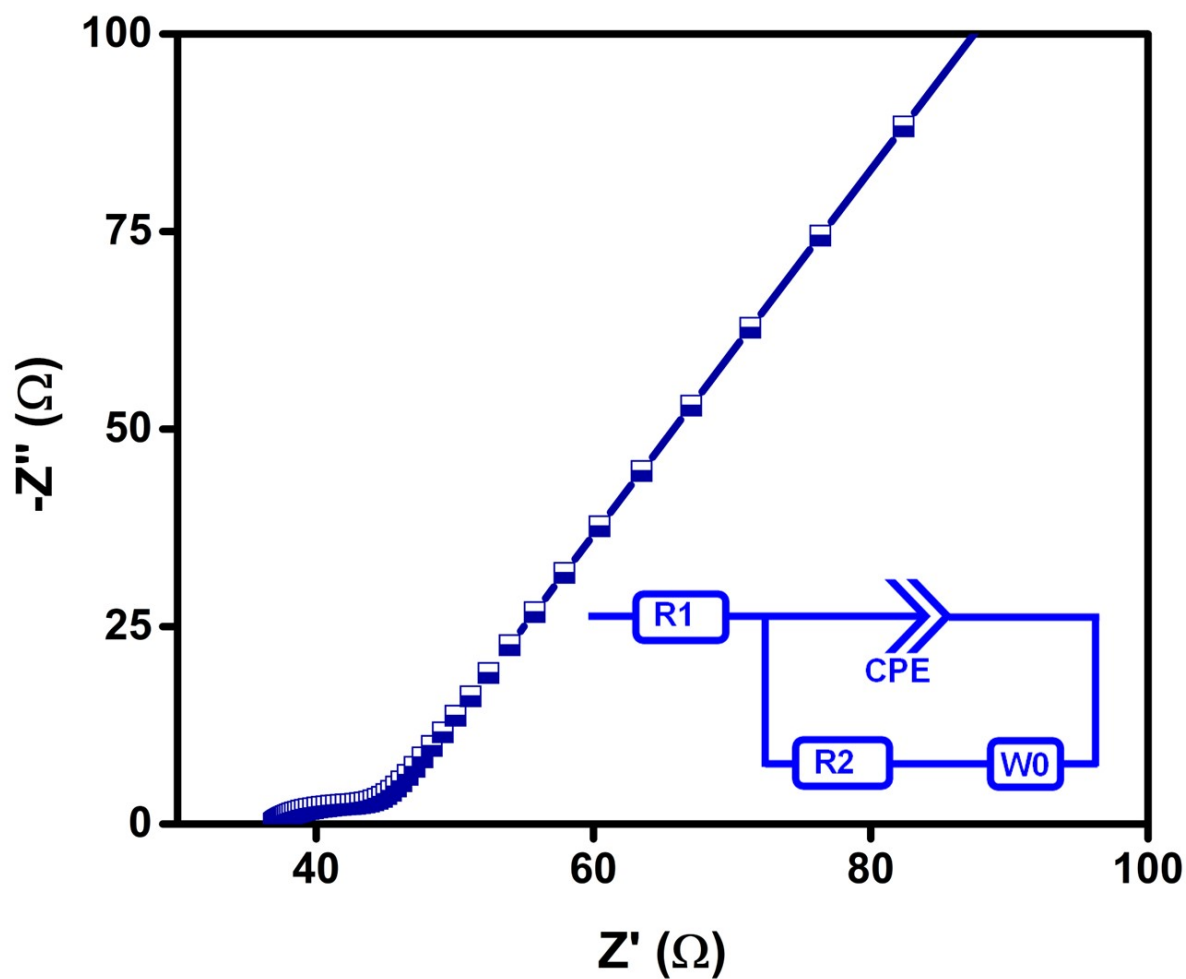

**Figure S5:** Nyquist plot of BCN electrode; inset showing the equivalent circuit.

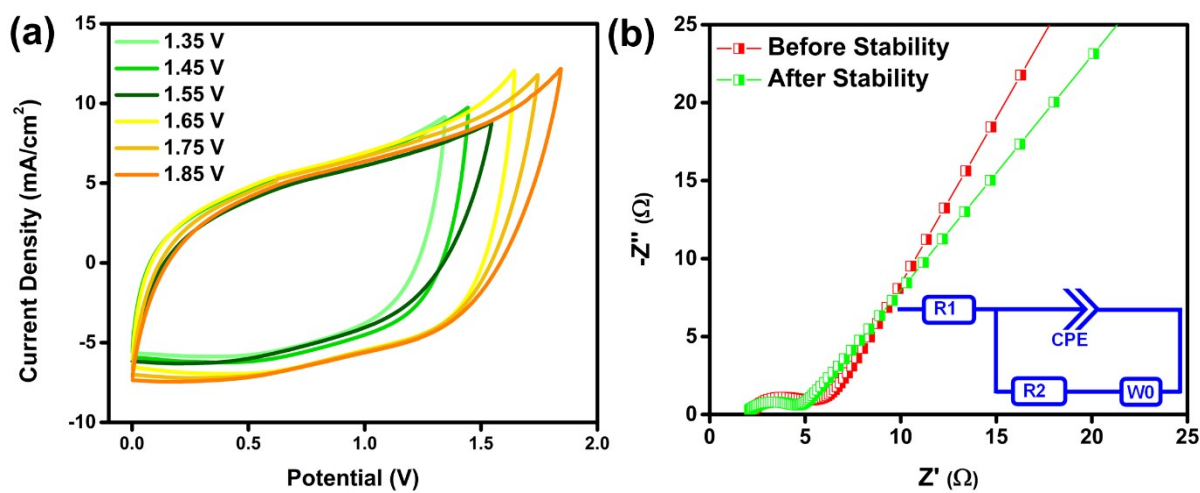

**Figure S6:** (a) S-VSe<sub>2</sub>/CNT//BCN ASC in various working potentials and (b) Nyquist plots of the ASC before and after stability test.



## S4. Tables

**Table S1:** EIS details of VSe<sub>2</sub>, S-VSe<sub>2</sub> and S-VSe<sub>2</sub>/CNT

| Sample                  | R <sub>s</sub> (Ω) | R <sub>ct</sub> (Ω) |
|-------------------------|--------------------|---------------------|
| VSe <sub>2</sub>        | 13.9               | 44.3                |
| S-VSe <sub>2</sub>      | 31.7               | 20.5                |
| S-VSe <sub>2</sub> /CNT | 14.4               | 14.8                |

**Table S2:** Comparison of electrochemical performance of S-VSe<sub>2</sub>/CNT//BCN ASC with other relevant ASCs.

| ASC                                                        | Electrolyte                        | Working Window (V) | Energy Density                                       | Cyclic stability    | Ref |
|------------------------------------------------------------|------------------------------------|--------------------|------------------------------------------------------|---------------------|-----|
| Co(OH) <sub>2</sub> //erGO (CG-ASC)                        | PVA-KOH                            | 1.4                | 11.85 μWh/cm <sup>2</sup> at 0.57 mW/cm <sup>2</sup> |                     | 52  |
| RuO <sub>2</sub> //Ti <sub>3</sub> C <sub>2</sub> in plane | PVA-H <sub>2</sub> SO <sub>4</sub> | 1.5                | 19 μWh/cm <sup>2</sup> at 1.5 mW/cm <sup>2</sup>     |                     | 44  |
| Ni-Co DHs/pen ink/nickel/CF// ink-coated nickel/CF         | PVA-KOH                            | 1.55               | 9.75 μWh/cm <sup>2</sup> at 0.49 mW/cm <sup>2</sup>  | 86% (5000 cycles)   | 53  |
| Ni(OH) <sub>2</sub> //AC                                   | PVA-KOH                            | 1.4                | 11.9 μWh/cm <sup>2</sup> at 0.169 mW/cm <sup>2</sup> | 92.7% (7000 cycles) | 54  |
| MnO <sub>2</sub> //Carbon paper                            | PVA-LiCl                           | 1.8                | 5.4 μWh/cm <sup>2</sup> at                           | 90%                 | 55  |

|                                                                      |                                         |             |                                                                            |                                |                  |
|----------------------------------------------------------------------|-----------------------------------------|-------------|----------------------------------------------------------------------------|--------------------------------|------------------|
|                                                                      |                                         |             | 0.28 mWh/cm <sup>2</sup>                                                   | (2000 cycles)                  |                  |
| CuCHF//PC                                                            | PVA-KCl                                 | 2.0         | 37.8 $\mu$ Wh/cm <sup>2</sup> at<br>0.18 mWh/cm <sup>2</sup>               | 84%<br>(2000 cycles)           | <sup>56</sup>    |
| CNT@ZnO-<br>NW@MnO <sub>2</sub> //CNT                                | PVA-H <sub>2</sub> SO <sub>4</sub>      | 1.5         | 13.25 $\mu$ Wh/cm <sup>2</sup> at<br>0.21 mWh/cm <sup>2</sup>              | 96.7%<br>(1000 cycles)         | <sup>57</sup>    |
| d-Ti <sub>3</sub> C <sub>2</sub> /CF//Ti <sub>3</sub> C <sub>2</sub> | 6M KOH                                  | 1.6         | 18.1 Wh/kg at<br>397.8 W/kg                                                | 80.6%<br>(5000 cycles)         | <sup>58</sup>    |
| CuS/ Ti <sub>3</sub> C <sub>2</sub> //Ti <sub>3</sub> C <sub>2</sub> | 1M KOH                                  | 1.5         | 15.4 Wh/kg at<br>750.2 W/kg                                                | 82.4%<br>(5000 cycles)         | <sup>59</sup>    |
| <b>S-VSe<sub>2</sub>/CNT//BCN</b>                                    | <b>0.5M K<sub>2</sub>SO<sub>4</sub></b> | <b>1.65</b> | <b>36.3 <math>\mu</math>Wh/cm<sup>2</sup> at<br/>3.2 mW/cm<sup>2</sup></b> | <b>87.3%<br/>(5000 cycles)</b> | <b>This Work</b> |
